# Supplementary material for: Desorganisierte Bindung und körperliche Gesundheit
Source: Springer Nature journal article supplement (doi:10.1007/s00278-023-00647-9), 2023-02-17
Supplement: MOESM1 [file 24039304]

|  | **Alter** | **Geschlecht** | **Familienstand** | **Schulbildung** | **Rauchen** | **Risk. Alkohol** | **BMI** | **ADA** | **DRS** | **ECR Angst** | **ERC Vermeidung** |
| --- | --- | --- | --- | --- | --- | --- | --- | --- | --- | --- | --- |
| **Bindung** |  |  |  |  |  |  |  |  |  |  |  |
| Adult Disorganized Attachment (ADA) | -,16** | ,04 | -,20** | -,08* | -,01 | ,08** | ,02 | - |  |  |  |
| Disorganized Response Scale (DRS) | -,21** | ,01 | -,16** | -,07* | -,02 | ,08* | ,04 | ,64** | - |  |  |
| ECR Angst | -,28** | ,12** | -,23** | -,00 | -,05 | ,08** | -,04 | ,62** | ,52** | - |  |
| ECR Vermeidung | -,11** | ,05 | -,19** | -,10** | -,01 | ,02 | ,04 | ,56** | ,38** | ,44** | - |
| **Körperliche Erkrankungen** |  |  |  |  |  |  |  |  |  |  |  |
| Körp. Krankheitslast insgesamt | ,31** | -,03 | ,20** | -,19** | ,23** | ,06* | ,25** | ,12** | ,11** | ,10** | ,07* |
| Unfallverletzungen | ,10** | -,11 | ,05 | -,01 | ,09** | ,09** | ,05 | -,03 | ,02 | ,00 | ,00 |
| Muskel-Skelett-System | ,31** | -,01 | ,22** | -,16** | ,24** | ,05 | ,15** | -,05 | -,05 | ,00 | ,03 |
| Herz-Kreislauf-System | ,42** | -,18** | ,20** | -,17** | ,23** | ,01 | ,35** | -,04 | -,07* | -,09** | -,01 |
| Atemwege | ,16** | -,01 | ,15** | -,12** | ,14** | ,06* | ,10** | ,05 | ,10** | ,05 | ,03 |
| Neurologisches System | ,16** | -,02 | ,07* | -,14** | ,10** | ,01 | ,10** | ,14** | ,12** | ,09** | ,06 |
| Verdauungssystem | ,13** | ,01 | ,06* | -,12** | ,02 | ,00 | ,07* | ,06* | ,05 | ,07* | ,05 |
| Urogenitaltrakt | ,17** | -,03 | ,09** | -,06* | ,07* | ,01 | ,05 | ,05 | ,05 | ,01 | -,01 |
| Haut | -,04 | ,02 | ,01 | ,02 | ,01 | ,04 | ,05 | ,05 | ,05 | ,06 | ,05 |
| Tumore/ Krebs | ,11** | -,03 | ,05 | -,02 | ,09** | -,01 | ,04 | ,06* | ,05 | ,02 | -,03 |
| Hormon-/ Stoffwechsel | ,22** | ,02 | ,16** | -,12** | ,14** | -,04 | ,31** | ,06 | ,03 | ,04 | ,03 |
| Blut | -,01 | ,06* | ,00 | -,07* | -,01 | -,01 | -,04 | ,09** | ,11** | ,09** | ,04 |

**Tabelle S1_Online-Anhang:** Korrelationen der soziodemografischen Variablen mit körperlicher Krankheitslast, Bindung und der einzelnen diagnostizierten Erkrankungen

(* *p <* 0,05; ** *p <* 0,01)
